# Supplementary material for: Green synthesis of a disordered N-doped carbonaceous aerogel from waste for the removal of over-the-counter drugs and environmental assessment
Source: Royal Society of Chemistry journal article supplement (doi:10.1039/d4lf00046c), 2024-01-01
Supplement: d4lf00046c1.pdf [file d4lf00046c1.pdf]

# Green Synthesis of disordered N-doped Carbonaceous Aerogel from Waste for the Removal of Over-the-counter Drugs and Environmental Assessment

Himanshu Asati,<sup>1</sup> Raka Mondal,<sup>2</sup> Kumud Malika Tripathi<sup>1\*</sup>

<sup>1</sup> Department of Chemistry, Indian Institute of Petroleum & Energy, Visakhapatnam, Andhra Pradesh, India, 530003.

<sup>2</sup> Department of Chemical Engineering, Indian Institute of Petroleum & Energy, Visakhapatnam, Andhra Pradesh, India, 530003.

Email: [kumud20010@gmail.com](mailto:kumud20010@gmail.com), [kumud@iipe.ac.in](mailto:kumud@iipe.ac.in)

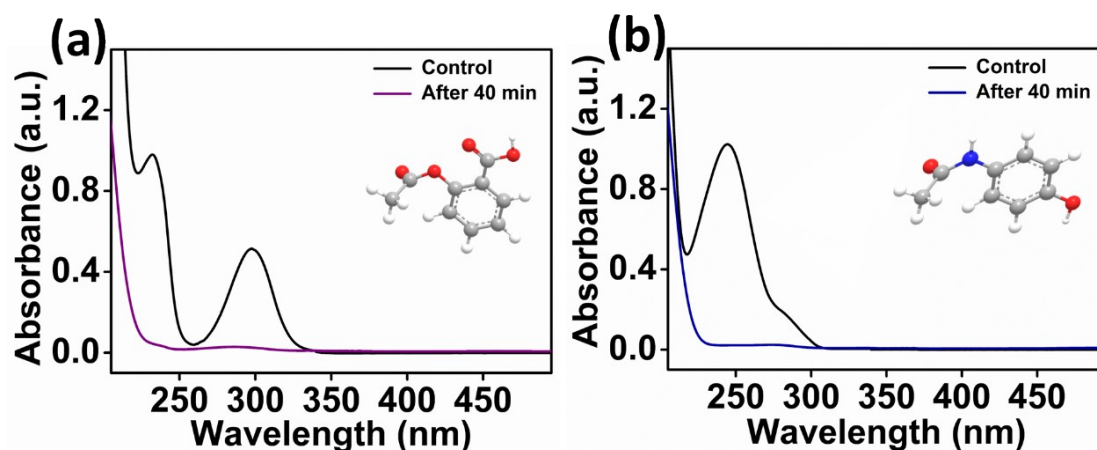

Fig. S1 UV-vis spectra of (a) ASP and (b) PCM before and after 40 minutes of adsorption.

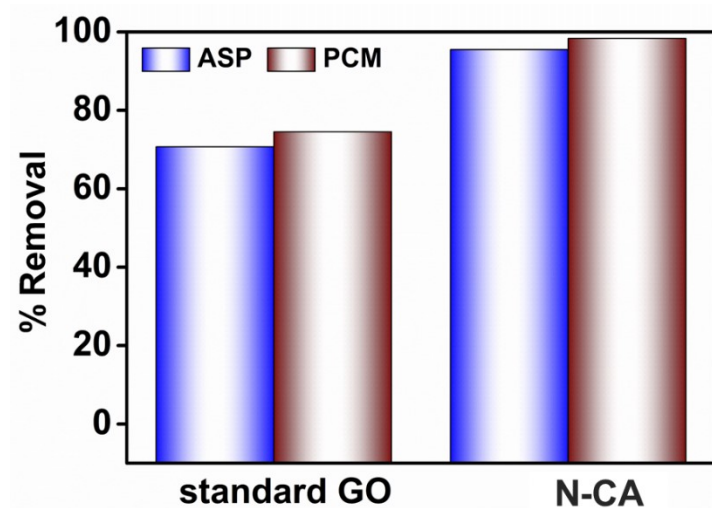

**Fig. S2** Comparative adsorption efficiency of N-CA with GO towards the adsorption of ASP and PCM.

**Table. S1** Pseudo first order and pseudo second order kinetics for ASP and PCM adsorption.

| <b>Pseudo First Order</b> |                                 |                                |        |                                             |                                             |
|---------------------------|---------------------------------|--------------------------------|--------|---------------------------------------------|---------------------------------------------|
|                           | $C_0$<br>( $\text{mg L}^{-1}$ ) | $k_1$<br>( $\text{min}^{-1}$ ) | $R^2$  | $q_e, \text{cal}$<br>( $\text{mg g}^{-1}$ ) | $q_e, \text{exp}$<br>( $\text{mg g}^{-1}$ ) |
| <b>ASP</b>                | 20                              | 0.1932                         | 0.8638 | $32.3832 \pm 26.8674$                       | 12.4183                                     |
| <b>PCM</b>                | 15                              | 0.1662                         | 0.8837 | $9.5751 \pm 6.0409$                         | 9.6159                                      |

  

| <b>Pseudo Second Order</b> |                                 |                                |        |                                             |                                             |
|----------------------------|---------------------------------|--------------------------------|--------|---------------------------------------------|---------------------------------------------|
|                            | $C_0$<br>( $\text{mg L}^{-1}$ ) | $k_2$<br>( $\text{min}^{-1}$ ) | $R^2$  | $q_e, \text{cal}$<br>( $\text{mg g}^{-1}$ ) | $q_e, \text{exp}$<br>( $\text{mg g}^{-1}$ ) |
| <b>ASP</b>                 | 20                              | 0.0139                         | 0.9975 | $10.6838 \pm 0.1873$                        | 12.4183                                     |
| <b>PCM</b>                 | 15                              | 0.0362                         | 0.9989 | $7.8474 \pm 0.0887$                         | 9.6159                                      |

**Table. S2** Langmuir and Freundlich adsorption isotherm for ASP and PCM adsorption.

---

| <b>Langmuir Isotherm</b> |                                                    |                                                    |                      |                                                    |                      |
|--------------------------|----------------------------------------------------|----------------------------------------------------|----------------------|----------------------------------------------------|----------------------|
|                          | <b>C<sub>0</sub></b><br><b>(mg L<sup>-1</sup>)</b> | <b>K<sub>L</sub></b><br><b>(mg g<sup>-1</sup>)</b> | <b>R<sup>2</sup></b> | <b>q<sub>m</sub></b><br><b>(mg g<sup>-1</sup>)</b> | <b>R<sub>L</sub></b> |
| <b>ASP</b>               | 20                                                 | 0.0384                                             | 0.9842               | 138.6963 ± 7.8687                                  | 0.5658               |
| <b>PCM</b>               | 15                                                 | 0.0836                                             | 0.9973               | 117.7856 ± 2.7219                                  | 0.4437               |

---

| <b>Freundlich Isotherm</b> |                                                    |                                                    |                      |                 |
|----------------------------|----------------------------------------------------|----------------------------------------------------|----------------------|-----------------|
|                            | <b>C<sub>0</sub></b><br><b>(mg L<sup>-1</sup>)</b> | <b>K<sub>F</sub></b><br><b>(mg g<sup>-1</sup>)</b> | <b>R<sup>2</sup></b> | <b>n</b>        |
| <b>ASP</b>                 | 20                                                 | 6.7234                                             | 0.8305               | 2.1101 ± 0.4349 |
| <b>PCM</b>                 | 15                                                 | 11.9017                                            | 0.9133               | 2.1408 ± 0.2976 |

---
